# Supplementary material
Source: HighWire-hosted journal article supplement (https://jitc.bmj.com/content/10/1/e003368)
Supplement: inline-supplementary-material-6 [file inline-supplementary-material-6.pdf]

| Type                | CAN-2409 vs Control |       | Dexamethasone vs Control |       | Combination vs Control |       | Dexamethasone vs CAN-2409 |       | Combination vs CAN-2409 |       | Combination vs Dexamethasone |       |
|---------------------|---------------------|-------|--------------------------|-------|------------------------|-------|---------------------------|-------|-------------------------|-------|------------------------------|-------|
|                     | P                   | adjP  | P                        | adjP  | P                      | adjP  | P                         | adjP  | P                       | adjP  | P                            | adjP  |
| <b>B cells</b>      | 0.066               | 0.160 | 0.045                    | 0.135 | 0.874                  | 0.874 | 0.001                     | 0.010 | 0.088                   | 0.203 | 0.034                        | 0.151 |
| <b>CD4+T cell</b>   | 0.239               | 0.431 | 0.130                    | 0.293 | 0.563                  | 0.733 | 0.013                     | 0.020 | 0.090                   | 0.203 | 0.328                        | 0.590 |
| <b>DN T</b>         | 0.532               | 0.599 | 0.775                    | 0.872 | 0.570                  | 0.733 | 0.368                     | 0.368 | 0.954                   | 0.954 | 0.398                        | 0.597 |
| <b>T reg</b>        | 0.451               | 0.581 | 0.001                    | 0.010 | 0.035                  | 0.316 | 0.005                     | 0.016 | 0.144                   | 0.259 | 0.102                        | 0.305 |
| <b>NK cells</b>     | 0.071               | 0.160 | 0.562                    | 0.843 | 0.423                  | 0.733 | 0.195                     | 0.219 | 0.277                   | 0.356 | 0.821                        | 0.821 |
| <b>CD8+ T cells</b> | 0.011               | 0.051 | 0.690                    | 0.872 | 0.280                  | 0.733 | 0.005                     | 0.016 | 0.089                   | 0.203 | 0.149                        | 0.336 |
| <b>DP T</b>         | 0.452               | 0.581 | 0.043                    | 0.135 | 0.775                  | 0.872 | 0.012                     | 0.020 | 0.634                   | 0.713 | 0.027                        | 0.151 |
| <b>Neutrophil</b>   | 0.009               | 0.051 | 0.903                    | 0.903 | 0.443                  | 0.733 | 0.011                     | 0.020 | 0.032                   | 0.203 | 0.516                        | 0.663 |
| <b>Mac/Mon</b>      | 0.632               | 0.632 | 0.218                    | 0.392 | 0.401                  | 0.733 | 0.097                     | 0.125 | 0.197                   | 0.295 | 0.677                        | 0.762 |
