# Supplementary material
Source: HighWire-hosted journal article supplement (https://jitc.bmj.com/content/10/1/e003368)
Supplement: inline-supplementary-material-8 [file inline-supplementary-material-8.pdf]

## Panel with HMA CyTOF Abs

| Marker                                | Clone              | Metal        |
|---------------------------------------|--------------------|--------------|
| <b>CD19</b>                           | <b>6D5</b>         | <b>113In</b> |
| <b>CD45 for mouse</b>                 | <b>30-F11</b>      | <b>115In</b> |
| <b>CD44</b>                           | <b>IM7</b>         | <b>141Pr</b> |
| <b>CD38</b>                           | <b>90</b>          | <b>142Nd</b> |
| <b>CD73</b>                           | <b>TY/11.8</b>     | <b>143Nd</b> |
| <b>VEGF R1/Flt-1</b>                  | <b>141522</b>      | <b>144Nd</b> |
| <b>CD4</b>                            | <b>RM4-5</b>       | <b>145Nd</b> |
| <b>CD11c</b>                          | <b>N418</b>        | <b>146Nd</b> |
| <b>LAG3</b>                           | <b>C9B7W</b>       | <b>147Sm</b> |
| <b>Ly6G</b>                           | <b>1A8</b>         | <b>148Nd</b> |
| <b>PD-L1</b>                          | <b>10F.9G2</b>     | <b>149Sm</b> |
| <b>Arginase</b>                       | <b>POLYCLONAL</b>  | <b>150Nd</b> |
| <b>Ly6C</b>                           | <b>HK1.4</b>       | <b>151Eu</b> |
| <b>CD3</b>                            | <b>145-2C11</b>    | <b>152Sm</b> |
| <b>CD172a/SIRP<math>\alpha</math></b> | <b>P84</b>         | <b>153Eu</b> |
| <b>CD103</b>                          | <b>2E7</b>         | <b>154Sm</b> |
| <b>CD68</b>                           | <b>FA-11</b>       | <b>155Gd</b> |
| <b>CD14</b>                           | <b>Sa14-2</b>      | <b>156Gd</b> |
| <b>CD205</b>                          | <b>NLDC-145</b>    | <b>158Gd</b> |
| <b>CD39</b>                           | <b>Duha59</b>      | <b>159Tb</b> |
| <b>CD11b</b>                          | <b>M1/70</b>       | <b>160Gd</b> |
| <b>CD62L/L-Selectin</b>               | <b>MEL-14</b>      | <b>161Dy</b> |
| <b>FoxP3</b>                          | <b>FJK-16s</b>     | <b>162Dy</b> |
| <b>NK1.1</b>                          | <b>PK136</b>       | <b>163Dy</b> |
| <b>CD8<math>\alpha</math></b>         | <b>53-6.7</b>      | <b>164Dy</b> |
| <b>CD115</b>                          | <b>460615</b>      | <b>165Ho</b> |
| <b>CD86/B7-2</b>                      | <b>GL-1</b>        | <b>166Er</b> |
| <b>Granzyme B</b>                     | <b>GB11</b>        | <b>167Er</b> |
| <b>CD64</b>                           | <b>X54-5/7.1</b>   | <b>168Er</b> |
| <b>CD196/CCR6</b>                     | <b>29-2L 17</b>    | <b>169Tm</b> |
| <b>PD-1H/VISTA</b>                    | <b>MH5A</b>        | <b>170Er</b> |
| <b>CD279/PD-1</b>                     | <b>29F.1A12</b>    | <b>171Yb</b> |
| <b>CD206</b>                          | <b>C068C2</b>      | <b>172Yb</b> |
| <b>CD69</b>                           | <b>H1.2F3</b>      | <b>173Yb</b> |
| <b>CCR2</b>                           | <b>SA230G11</b>    | <b>174Yb</b> |
| <b>F4-80</b>                          | <b>BM8</b>         | <b>175Lu</b> |
| <b>CD152/CTLA-4</b>                   | <b>UC10-4B9</b>    | <b>176Yb</b> |
| <b>I-A/I-E (MHC II)</b>               | <b>M5/114.15.2</b> | <b>209Bi</b> |
